# Supplementary material for: Documenting research with transgender and gender diverse people: protocol for an evidence map and thematic analysis
Source: Springer Nature journal article supplement (doi:10.1186/s13643-017-0427-5), 2017-02-20
Supplement: MOESM1 [file 12078068]

**PRISMA-P (Preferred Reporting Items for Systematic review and Meta-Analysis Protocols) 2015 Checklist**

| Section and topic                 | Item No | Checked | Source     |
|-----------------------------------|---------|---------|------------|
| <b>ADMINISTRATIVE INFORMATION</b> |         |         |            |
| Title:                            |         |         |            |
| Identification                    | 1a      | ✓       | Title page |
| Update                            | 1b      | NA      |            |
| Registration                      | 2       | NA      |            |
| Authors:                          |         |         |            |
| Contact                           | 3a      | ✓       | Title page |
| Contributions                     | 3b      | ✓       | Page 14    |
| Amendments                        | 4       | NA      |            |
| Support:                          |         |         |            |
| Sources                           | 5a      | ✓       | Page 14    |
| Sponsor                           | 5b      | NA      |            |
| Role of sponsor or funder         | 5c      | ✓       | Page 14    |
| <b>INTRODUCTION</b>               |         |         |            |
| Rationale                         | 6       | ✓       | Page 4-6   |
| Objectives                        | 7       | ✓       | Page 6-7   |
| <b>METHODS</b>                    |         |         |            |
| Eligibility criteria              | 8       | ✓       | Page 7-8   |
| Information sources               | 9       | ✓       | Page 9     |
| Search strategy                   | 10      | ✓       | Page 9     |
| Study records:                    |         |         |            |
| Data management                   | 11a     | ✓       | Page 9     |

|                                    |     |    |            |
|------------------------------------|-----|----|------------|
| Selection process                  | 11b | ✓  | Page 9-11  |
| Data collection process            | 11c | ✓  | Page 11    |
| Data items                         | 12  | ✓  | Page 11-12 |
| Outcomes and prioritization        | 13  | NA |            |
| Risk of bias in individual studies | 14  | NA |            |
| Data synthesis                     | 15a | NA |            |
|                                    | 15b | NA |            |
|                                    | 15c | NA |            |
|                                    | 15d | ✓  | Page 12    |
| Meta-bias(es)                      | 16  | NA |            |
| Confidence in cumulative evidence  | 17  | NA |            |

NA – Not applicable
